# Supplementary material for: Effect of <em>Spirulina maxima</em> Supplementation and a Systematic Physical Exercise Program on Body Composition and Cardiorespiratory Fitness of Overweight or Obese Subjects: A Double Blind Randomized, Crossover Controlled Trial
Source: Preprints.org preprint supplement (doi:10.20944/preprints201808.0427.v1), 2018-08-24
Supplement: Supplementary file 1 [file supplementary]

## Supplementary File 1 - Partial chemical characterization of *Spirulina maxima*

### Methods

1. *Microbiological analysis.* Total aerobic mesophilic bacteria, total coliforms, molds and yeast were determined by plating diluted spirulina samples in 3M™ Petrifilm™ plates, following manufacturing instructions.
2. *Heavy metals.* Chromium, zinc, lead, cadmium and arsenic (ppm) were analyzed according recommendations from the United States Protection Agency [37], by atomic absorption spectrometry (Perkín Elmer Analyst 200, USA).
3. *Chemical analysis.* Protein, fat, moisture, ash and carbohydrates (by difference) were assayed by approved AOAC methods procedures by triplicate.
4. *SDS-PAGE.* Molecular distribution of reduced/denatured protein species in *S. maxima* was determined by sodium dodecyl sulfate (SDS) gel electrophoresis according to Laemmli [38].
5. *Antioxidant profile.* Total phenolic compounds were determined by the method reported by García-Galaz *et al.* [39], total flavonoids by the method reported by Álvarez-Parrilla *et al.* [40], and the total carotenoids/chlorophylls according to Jensen [41].

### Results

1. *S. maxima* showed absence of coliforms, yeasts, molds and mesophilic aerobes presence, so it was considered safe for human consumption.
2. The content (ppm) of Pb ( $0.11 \pm 0.02$ ), Cd ( $0.002 \pm 0.003$ ), As ( $0.04 \pm 0.05$ ), Zn ( $1.54 \pm 0.18$ ) in *S. maxima* were within the permissible limits.
3. *S. maxima* showed a total of 65% protein, 9% ash, 9% moisture, 1% lipids and 16% carbohydrates (by difference).
4. SDS-PAGE allowed the detection of two major proteins with an average molecular weight of 18 and 21 kDa (**Figure S1**), perhaps corresponding to Chethana *et al* [42].
5. Major antioxidant phytochemical content in *S. maxima* is described in **Table S1**.

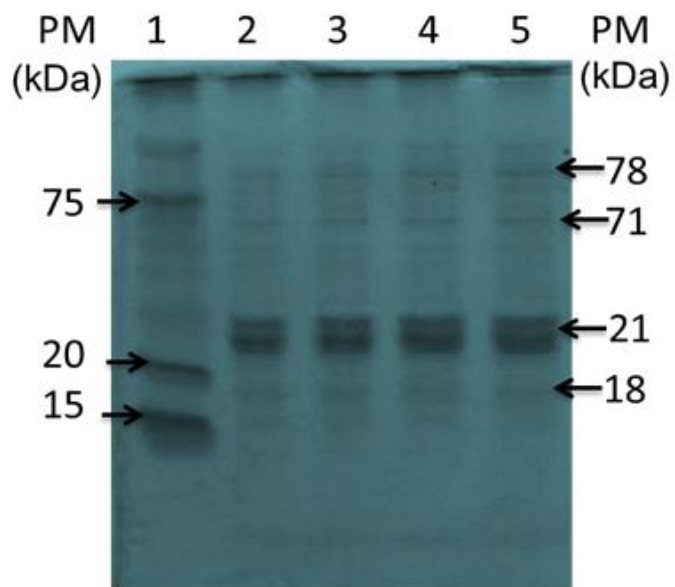

**Figure S1.** SDS-PAGE of *S. maxima*. Lane 1= Molecular marker; Lanes 2,3= *S. maxima* sample (10  $\mu\text{g/mL}$ ); Lanes 4,5= *S. maxima* sample (15  $\mu\text{g/mL}$ ).

**Table S1.** Antioxidant phytochemicals in *Spirulina maxima*

| Total phenolics | Flavonoids     | Carotenoids         | Chlorophylls    |
|-----------------|----------------|---------------------|-----------------|
| mgGAE/g DW      | mgCE/g DW      | mg $\beta$ -CE/g DW | mg/g DW         |
| $4.9 \pm 0.22$  | $0.9 \pm 0.06$ | $17.1 \pm 0.37$     | $41.9 \pm 1.32$ |

Dry weight (DW); gallic acid (GAE), catechin (CE) and  $\beta$ -carotene ( $\beta$ -CE) equivalents
