# Supplementary material for: Effect of <em>Spirulina maxima</em> Supplementation and a Systematic Physical Exercise Program on Body Composition and Cardiorespiratory Fitness of Overweight or Obese Subjects: A Double Blind Randomized, Crossover Controlled Trial
Source: Preprints.org preprint supplement (doi:10.20944/preprints201808.0427.v1), 2018-08-24
Supplement: Supplementary file 2 [file supplementary]

Archive with 3 entries (3 files):
- Supplementary Files/Supplementary File 1.pdf
- Supplementary Files/Supplementary File 2.pdf
- Supplementary Files/Supplementary File 3.pdf
