# Supplementary material for: Effect of <em>Spirulina maxima</em> Supplementation and a Systematic Physical Exercise Program on Body Composition and Cardiorespiratory Fitness of Overweight or Obese Subjects: A Double Blind Randomized, Crossover Controlled Trial
Source: Preprints.org preprint supplement (doi:10.20944/preprints201808.0427.v1), 2018-08-24

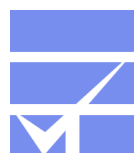

# CONSORT

TRANSPARENT REPORTING of TRIALS

## Supplementary File 3. CONSORT 2010 Flow Diagram of the progress through the phases of the trial.

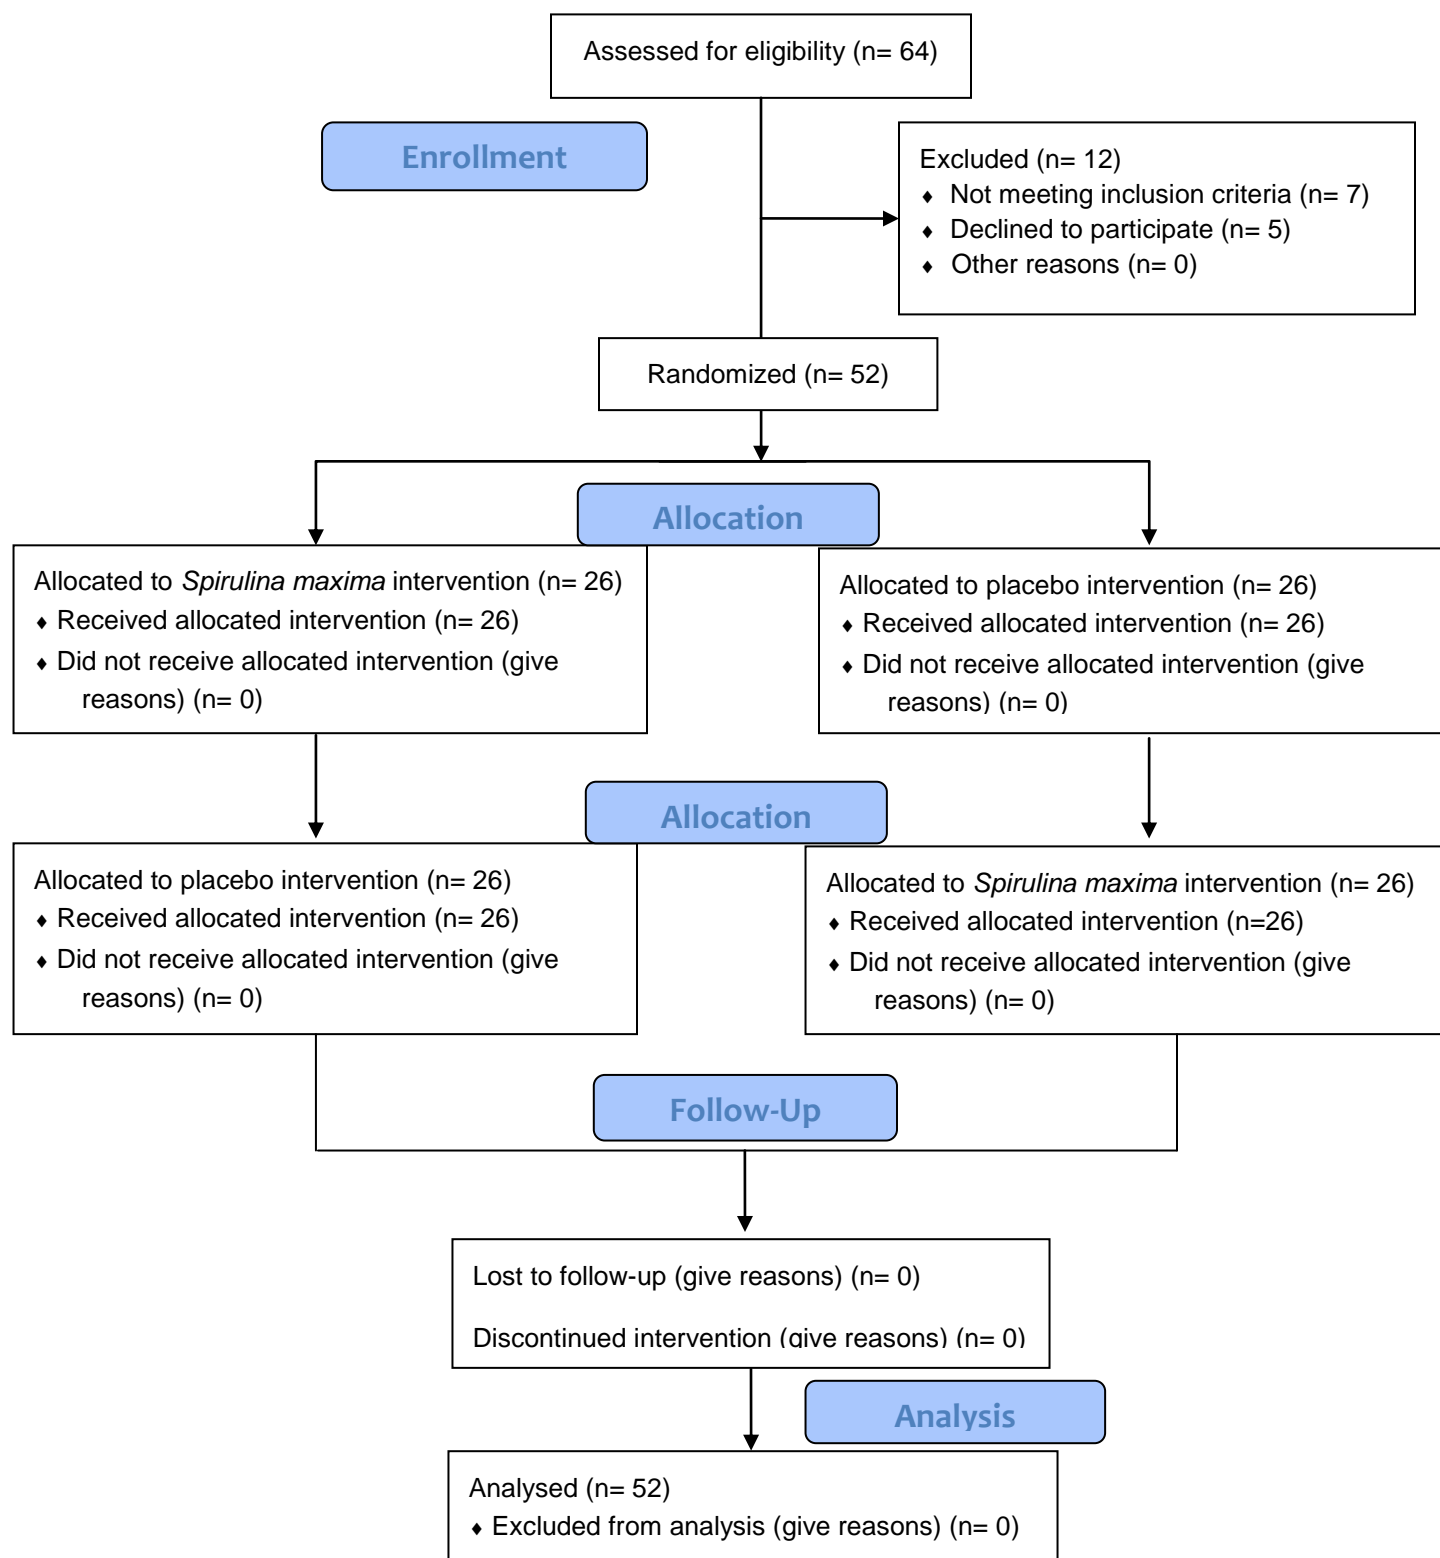

Supplement: Supplementary file 2 [file supplementary › Supplementary Files/Supplementary File 3.pdf]
